# Supplementary material for: To what extent can clinical characteristics be used to distinguish encephalitis from encephalopathy of other causes? Results from a prospective observational study
Source: PubMed Central journal article supplement (PMC6343342; doi:10.1186/s12879-018-3570-2), 2019-01-22
Supplement: 12879_2018_3570_MOESM1_ESM.pdf [file 12879_2018_3570_MOESM1_ESM.pdf]

**Additional file 1:** Diagnostic evaluation of patients with suspected encephalitis

**Step 1 Initial testing, all patients<sup>a</sup>**

**CSF (“study package”):**

- Leucocyte count, protein, glucose, albumin
- Virus PCR: enterovirus, HSV1 and 2, VZV
- Microscopy and culture; if treated with antibiotics; bacterial PCR
- Extra CSF stored for additional testing <sup>a,b</sup>

**Serum (“study package”):**

- HIV, EBV, CMV, Parvo B19 virus, Toxoplasmosis, Treponema
- Extra serum stored for additional testing <sup>a,b</sup>

**Other tests (recommended):**

- noseswab (airway viruses, mycoplasma pneumoniae)
- faeces for enterovirus
- vesicles (HSV-/VZV-PCR)

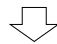

If negative or clinical suspicion of auto- immune encephalitis:

- Encephalitis antibodies in serum and CSF<sup>b</sup>
- Paraneoplastic antibodies in serum and CSF<sup>b</sup>
- Screening for malignancy (CT scan, tumor markers)

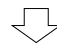

**Step 2 If step 1 is negative: repuncture**

- repeat PCR analysis of HSV, EV, VZV
- antibody production of HSV, VZV in CSF and serum
- consult infectious disease specialist for further analysis

**<sup>a</sup> Special indications:**

- if travel abroad: discussion with infectious disease consultant and targeted testing depending on destination and incubation period
- if immunocompromised: JC virus, Cryptococcus (antigen detection and PCR), HHV6, listeria monocytogenes, CMV- PCR, EBV-PCR
- Possible tick exposure (seasonal): B burgdorferi antibodies in serum and CSF and Tick borne encephalitis in serum.
- Exposure to TB or travel/ stay in TB endemic areas; CSF smear for acid fast bacilli, CSF mycobacterial culture, MTB PCR for CSF, Quantiferon

**<sup>b</sup> CSF and serum:**

Encephalitis antibodies: NMDAr, AMPAR1 and 2, GABAR1, CASPR2, LGI1, +/- VGKC  
Paraneoplastic antibodies: Hu, Ri, Yo, amphiphysin, CRPM5, MA1, Ma2
