# Supplementary material for: To what extent can clinical characteristics be used to distinguish encephalitis from encephalopathy of other causes? Results from a prospective observational study
Source: PubMed Central journal article supplement (PMC6343342; doi:10.1186/s12879-018-3570-2), 2019-01-22
Supplement: 12879_2018_3570_MOESM2_ESM.pdf [file 12879_2018_3570_MOESM2_ESM.pdf]

ROC curves of relevant parameters showing AUC for predicting encephalitis in an encephalopathic population

2A: ROC curves of individual symptoms/ findings

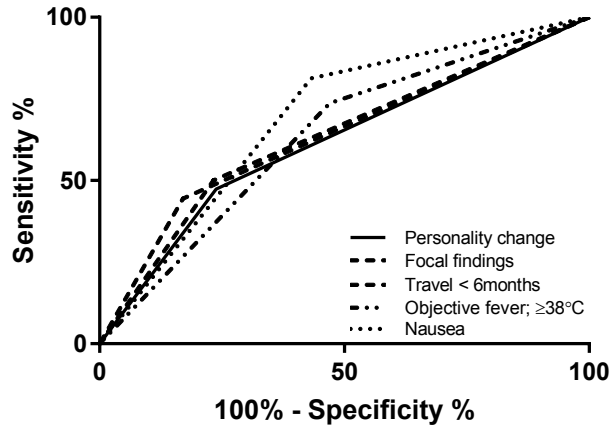

2B: ROC curves of individual blood analyses

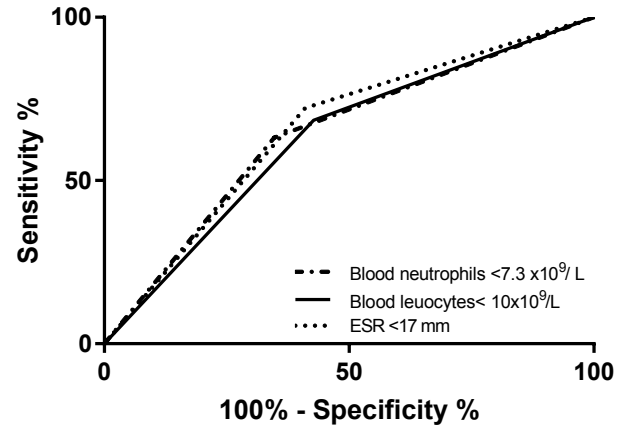

2C: ROC curves of CSF findings

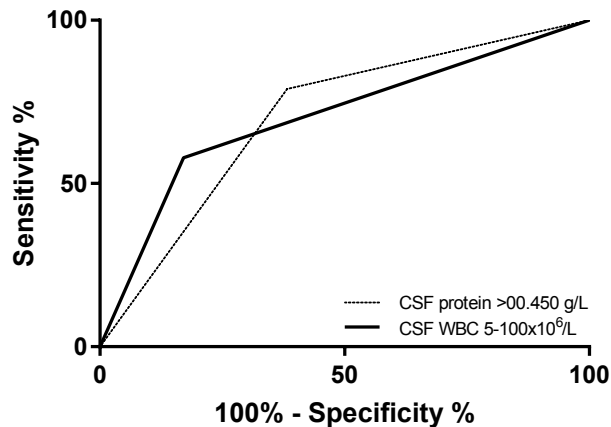

AUC (95% CI) of individual symptoms and findings, data from univariate logistic regression analyses.

**Fig 2A:** personality change: AUC= 0.62 (95% CI, 0.47-0.76), focal findings: AUC = 0.63 (95% CI, 0.49-0.78), fever: AUC = 0.63 (95% CI, 0.50-0.76), travel: AUC = 0.64 (95% CI, 0.49-0.79), nausea: AUC = 0.69 (95% CI, 0.56-0.82).

**Fig 2B:** ESR<17 mm: AUC = 0.66 (95% CI, 0.52-0.79), blood leucocytes <10x10<sup>9</sup>/L: AUC = 0.63 (95% CI, 0.50-0.76), blood neutrophils <7.3x10<sup>9</sup>/L: AUC = 0.64 (95% CI, 0.51-0.78). **Fig 2C:** CSF WBC 5-100x10<sup>6</sup>/L: AUC = 0,70 (95% CI, 0,57-0,84), CSF protein >0,45 g/L: AUC = 0,71 (95% CI, 0.59-0.83).
